# Supplementary material for: Three-dimensional carbon nanofiber-based anode for high generated current and power from air-cathode micro-sized MFC
Source: Royal Society of Chemistry journal article supplement (doi:10.1039/d2ra00591c), 2022-01-01
Supplement: d2ra00591c1.pdf [file d2ra00591c1.pdf]

# Three-dimensional Carbon Nanofiber-based Anode for Apparently High Generated Current and Power from Air-cathode Micro-sized MFC

Mohamed Taha Amen<sup>1,2,#</sup>, Hak Yong Kim<sup>1,3,\*</sup>, and Nasser A. M. Barakat<sup>3,4,\*,#</sup>

<sup>1</sup>Department of Nano Convergence Engineering, Jeonbuk National University, Jeonju 54896,  
Republic of South Korea

<sup>2</sup>Microbiology Department, Faculty of Agriculture, Zagazig University, Zagazig 44511, Egypt

<sup>3</sup>Department of Organic Materials and Fiber Engineering, Jeonbuk National University, Jeonju  
Jeonju 54896, Republic of Korea

<sup>4</sup>Chemical Engineering Department, Faculty of Engineering, Minia University, El-Minia 61519,  
Egypt

## Corresponding author:

Nasser A.M. Barakat,

Tel: +20862324008

Fax: +20862327684

E-mail: [nasbarakat@mu.edu.eg](mailto:nasbarakat@mu.edu.eg)

Hak Yong Kim ([khy@jbnu.ac.kr](mailto:khy@jbnu.ac.kr))

# These authors have similar contributions

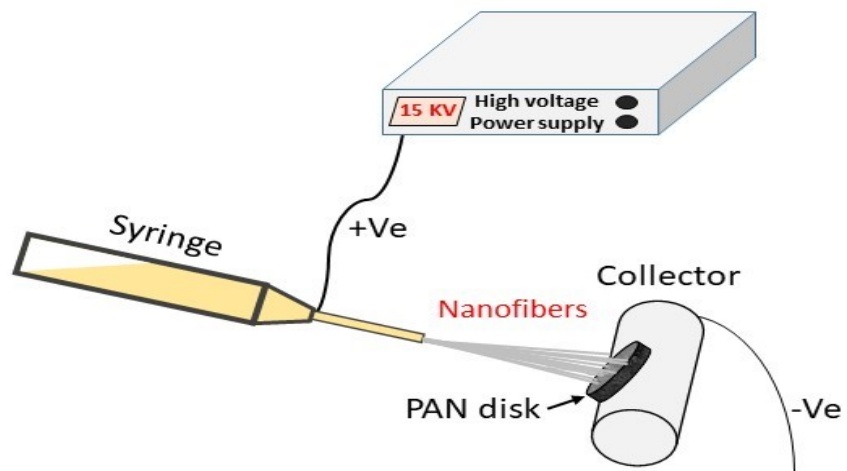

**Figure S1. Schematic representation of the utilized electrospinning setup using the PAN disk as a collector.**

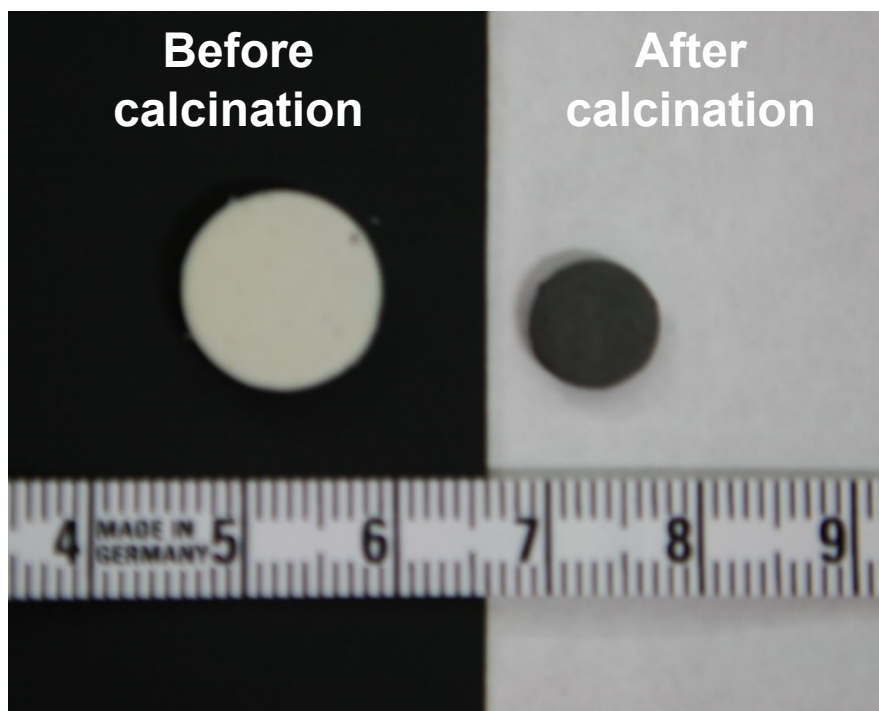

**Figure S2. Photographs of the prepared CNFs-attached graphite disk before and after calcination.**

**Table S1. Comparison between the  $\mu$ L-MFC performance in this work and reported studies**

| MFC configuration | Anode materials | Anode volume ( $\mu$ L) | Catholyte    | $P_{max}$ ( $mWm^{-2}$ ) | $I_{max}$ ( $mA m^{-2}$ ) | Sustainability (hours, mode) | Ref       |
|-------------------|-----------------|-------------------------|--------------|--------------------------|---------------------------|------------------------------|-----------|
| Single chamber    | CNFs            | 19.6                    | Air          | 8100                     | 44900                     | 205, Bat.                    | This work |
| Dual chamber      | Graphene        | 50                      | Ferricyanide | 5610                     | 15510                     | 336, Con.                    | 1         |
| Dual chamber      | Glod/ silver    | 39.3                    | Ferricyanide | 7720                     | 17700                     | 84, Con.                     | 2         |
| Dual chamber      | Toray paper     | 16                      | Phos. buffer | 20.8                     | 87.5 <sup>a</sup>         | 5, Bat.                      | 3         |
| Dual chamber      | PMMA            | 90                      | Ferricyanide | N/A                      | 80                        | 312, Bat.                    | 4         |
| Single chamber    | Graphene        | 25                      | Air          | 6                        | 1190                      | 240, Bat.                    | 5         |
| Single chamber    | Graphene        | 25                      | Air          | 8                        | 488                       | 240, Bat.                    | 5         |
| Single chamber    | MWCNTs          | 75                      | Air          | 19.36                    | 880                       | 360, Bat.                    | 6         |
| Single chamber    | Gold            | 75                      | Air          | 2.96                     | 156                       | 260, Bat.                    | 6         |
| Single chamber    | Nickel          | 75                      | Air          | 1.12                     | 39.6                      | 360, Bat.                    | 6         |
| Dual chamber      | Gold            | 15.5                    | Ferricyanide | 44                       | 260                       | 100, Cont.                   | 7         |
| Dual chamber      | MWCNTs          | 1.25                    | Ferricyanide | 19.6                     | 0.0059 <sup>a</sup>       | 50, Bat.                     | 8         |
| Dual chamber      | Gold            | 435                     | Ferricyanide | 15.9                     | 150                       | 18.3, Cont.                  | 9         |
| Dual chamber      | Gold            | 50                      | Ferricyanide | 330                      | 22.4 <sup>a</sup>         | 80, Cont.                    | 10        |
| Dual chamber      | Gold            | 0.3                     | Phos. buffer | N/A                      | 25.42                     | 15, Cont.                    | 11        |
| Dual chamber      | Gold            | 25                      | Air          | 29                       | 2148                      | 50, Bat.                     | 12        |
| Dual chamber      | Gold            | 4.5                     | Ferricyanide | 47                       | 330                       | 900, Cont.                   | 13        |
| Dual chamber      | Carbon cloth    | 5                       | Ferricyanide | N/A                      | 100                       | 100, Cont.                   | 14        |
| Dual chamber      | Gold            | 1.5                     | Ferricyanide | 1.5                      | 130                       | 180, Cont.                   | 15        |
| Dual chamber      | Gold            | Na                      | Ferricyanide | 1.15                     | 37                        | 17, Bat.                     | 16        |
| Dual chamber      | Gold            | 15                      | Ferricyanide | 4.012                    | 3.02                      | 1, Bat.                      | 17        |
| Dual chamber      | Gold            | 16                      | Ferricyanide | 0.023                    | 150                       | 1.3, Bat.                    | 18        |
| Single chamber    | Gold            | 10                      | Air          | N/A                      | 0.038                     | 2-3, Bat.                    | 19        |

<sup>a</sup>: Estimated from the polarization.

Bat: batch.

Cont: continuous.

$I_{max}$ : maximum current.

N/A: not available.

$P_{max}$ : maximum power.

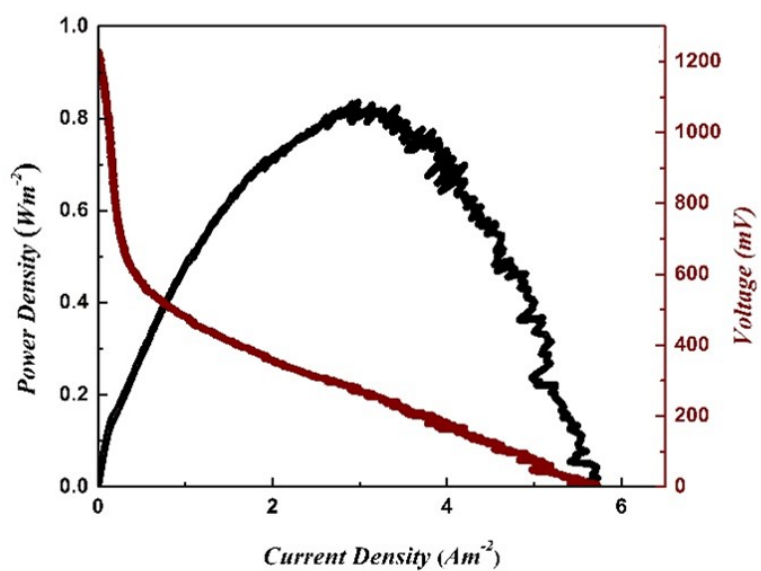

**Figure S3. Quasi-stationary polarization and power curve for  $\mu$ L-MFC10 after 30 min operation time, revealing a rapid startup with a valuable power density (0.83  $W m^{-2}$  at 2.98  $A m^{-2}$ ).**

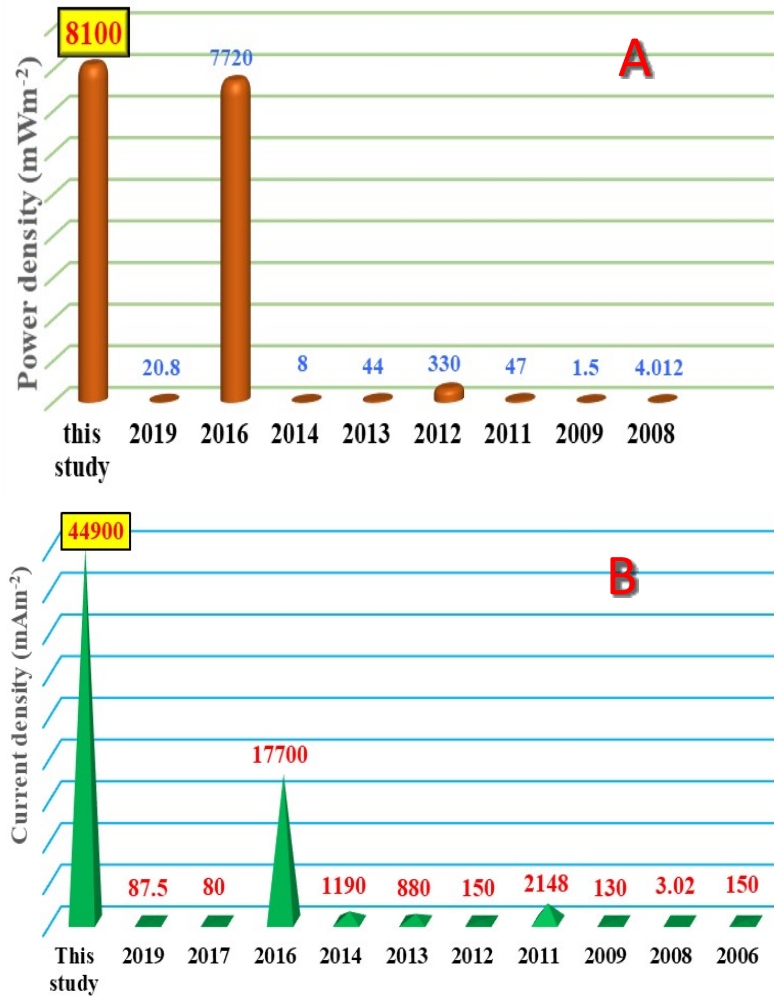

**Figure S4. Comparison between the power and current outputs of this work and previously proposed  $\mu$ L-MFCs (A & B respectively), see table S1 for more comparison details.**

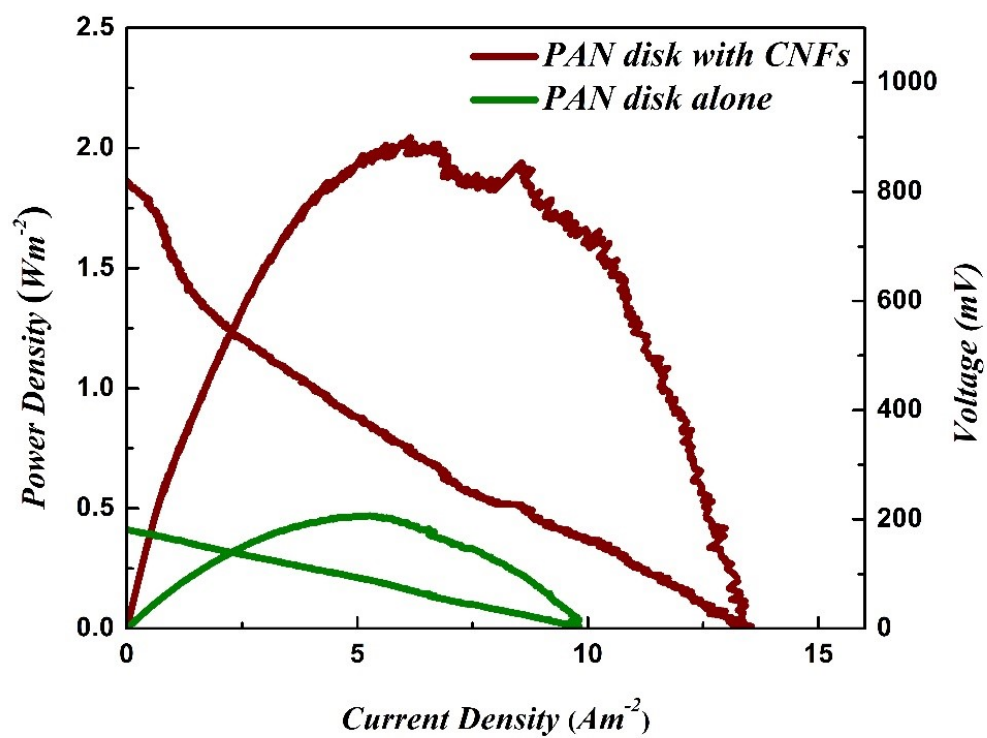

Figure S5. Quasi-stationary polarization and power curve for PAN disk with and without CNFs at 3 h of operation, demonstrating the outperforming of CNFs as anode than PNA disk alone with 4.35 and 1.4 times for the power and current densities, respectively.

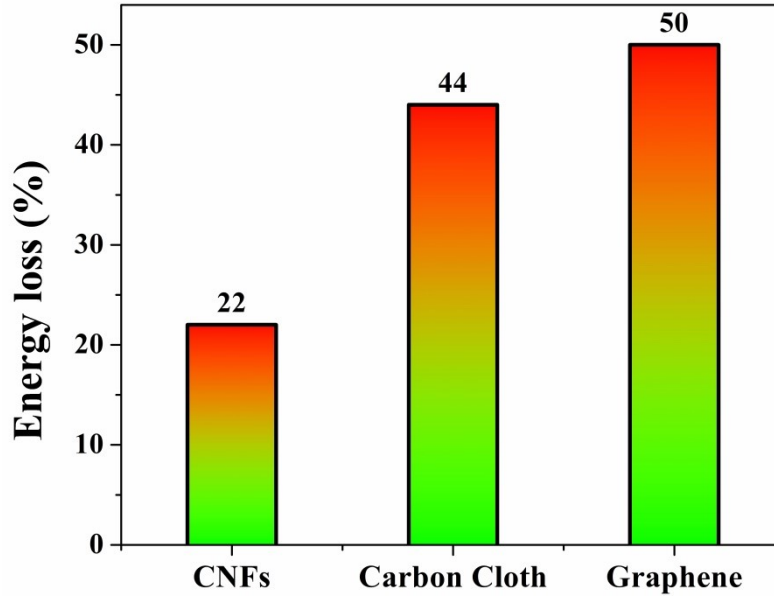

**Figure S6. Comparison between the energy loss percentages of CNFs as anode in this work and the previously purposed carbon cloth and graphene<sup>5</sup> based-microscale MFC, where the energy loss decreased for 22% comparing to 44% and 50% for carbon cloth and graphene, respectively.**



## References

1. H. Ren, H. Tian, C. L. Gardner, T.-L. Ren and J. Chae, *Nanoscale*, 2016, **8**, 3539-3547.
2. H. Ren, S. Rangaswami, H.-S. Lee and J. Chae, *Journal of Micromechanics and Microengineering*, 2016, **26**, 095016.
3. M. J. González-Pabón, F. Figueredo, D. C. Martínez-Casillas and E. Cortón, *PLoS One*, 2019, **14**, e0222538.
4. L. Liu and S. Choi, *J. Power Sources*, 2017, **348**, 138-144.
5. J. E. Mink, R. M. Qaisi, B. E. Logan and M. M. Hussain, *Npg Asia Materials*, 2014, **6**.
6. J. E. Mink and M. M. Hussain, *ACS Nano*, 2013, **7**, 6921-6927.
7. S. Choi and J. Chae, *Sensors and Actuators A: Physical*, 2013, **195**, 206-212.
8. J. E. Mink, J. P. Rojas, B. E. Logan and M. M. Hussain, *Nano Lett.*, 2012, **12**, 791-795.
9. H. Hou, L. Li, C. Ü. Ceylan, A. Haynes, J. Cope, H. H. Wilkinson, C. Erbay, P. de Figueiredo and A. Han, *Lab on a Chip*, 2012, **12**, 4151-4159.
10. S. Choi and J. Chae, *Sensors and Actuators A: Physical*, 2012, **177**, 10-15.
11. Z. Li, Y. Zhang, P. R. LeDuc and K. B. Gregory, *Biotechnology and bioengineering*, 2011, **108**, 2061-2069.
12. Y.-P. Chen, Y. Zhao, K.-Q. Qiu, J. Chu, R. Lu, M. Sun, X.-W. Liu, G.-P. Sheng, H.-Q. Yu and J. Chen, *Biosensors and Bioelectronics*, 2011, **26**, 2841-2846.
13. S. Choi, H.-S. Lee, Y. Yang, P. Parameswaran, C. I. Torres, B. E. Rittmann and J. Chae, *Lab on a Chip*, 2011, **11**, 1110-1117.
14. F. Qian, Z. He, M. P. Thelen and Y. Li, *Bioresource Technology*, 2011, **102**, 5836-5840.
15. F. Qian, M. Baum, Q. Gu and D. E. Morse, *Lab on a Chip*, 2009, **9**, 3076-3081.
16. H. Hou, L. Li, Y. Cho, P. De Figueiredo and A. Han, *PLoS One*, 2009, **4**, e6570.
17. M. Chiao, *Journal of Microelectromechanical systems*, 2008, **17**, 1329-1341.
18. M. Chiao, K. B. Lam and L. Lin, *Journal of Micromechanics and Microengineering*, 2006, **16**, 2547.
19. S. R. Crittenden, C. J. Sund and J. J. Sumner, *Langmuir*, 2006, **22**, 9473-9476.
